# Supplementary material
Source: PubMed Central journal article supplement (PMC8353160)
Supplement: jexbio-224-242615-s1.pdf [file jexbio-224-242615-s1.pdf]

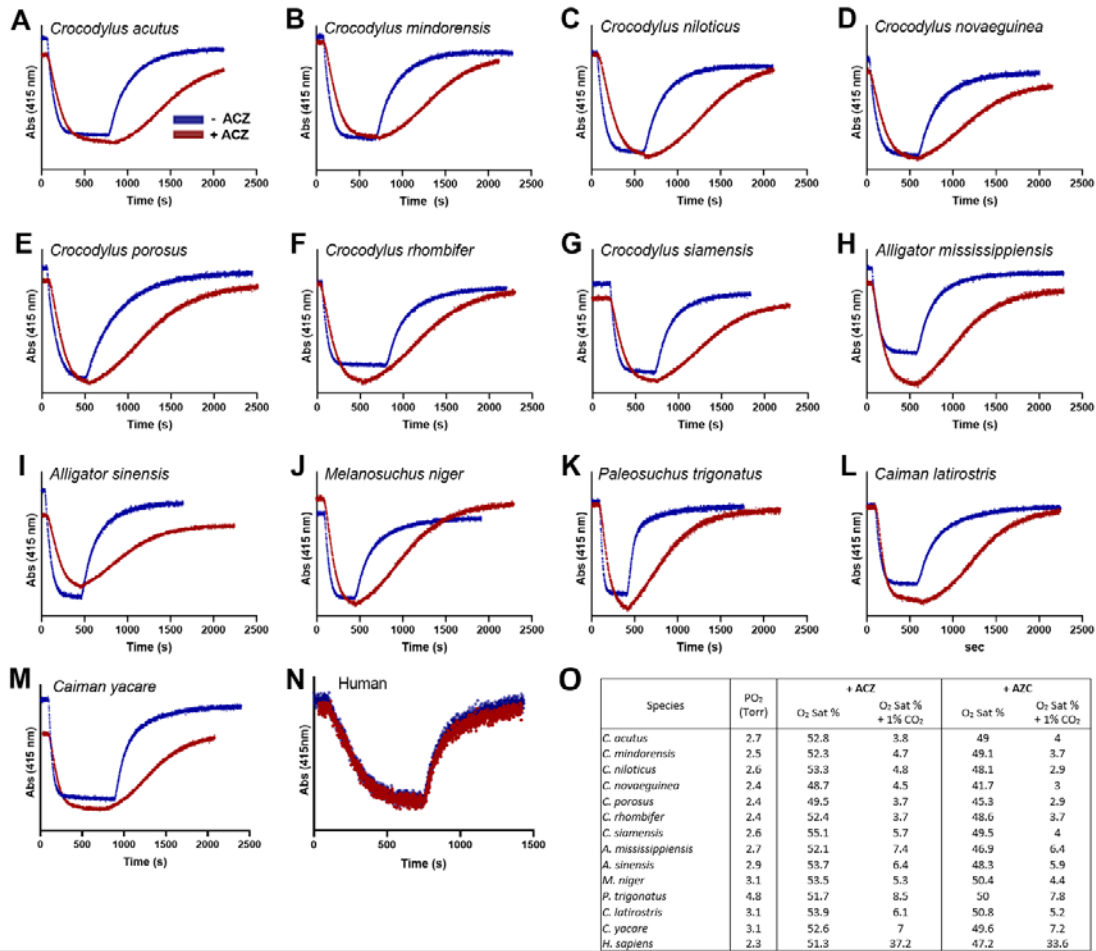

**Fig. S1.** Absorbance traces showing the CO<sub>2</sub>-mediated decrease in Hb-O<sub>2</sub> saturation in 13 species of crocodilians and in human. As shown in Figure 1, after equilibration with a PO<sub>2</sub> close to the P<sub>50</sub> (~3.1 torr), 1% CO<sub>2</sub> (~7.5 torr) was added to the gas mixture equilibrating the samples and the decrease in absorbance was followed over time at 415 nm using the diffusion chamber technique. Absorbance traces are shown in the absence (blue trace) and presence (red trace) of the CA inhibitor acetazolamide (ACZ) for: A) *Crocodylus acutus*, B) *Crocodylus mindorensis*, C) *Crocodylus niloticus*, D) *Crocodylus novaeguineae*, E) *Crocodylus porosus*, F) *Crocodylus rhombifer*, G) *Crocodylus siamensis*, H) *Alligator mississippiensis*, I) *Alligator sinensis*, J) *Melanosuchus niger*, K) *Paleosuchus trigonatus*, L) *Caiman latirostris* and, M) *Caiman yacare*, N) Human. The corresponding % O<sub>2</sub> saturation before and after addition of 1% CO<sub>2</sub> for each species is summarized in panel O.

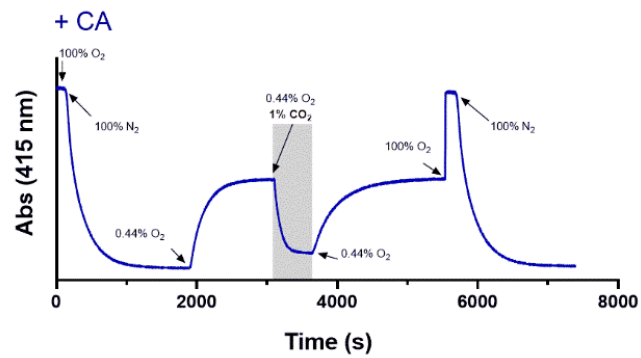

**Fig. S2.** Absorbance trace showing the CO<sub>2</sub>-mediated decrease in Hb-O<sub>2</sub> saturation in the hemolysate of spectacled caiman in the presence of added bovine carbonic anhydrase II (1 μM). After equilibration with 100% O<sub>2</sub> (100% O<sub>2</sub> saturation) and 100% N<sub>2</sub> (0% O<sub>2</sub> saturation), the sample was equilibrated with 0.44% O<sub>2</sub> (P<sub>O<sub>2</sub></sub> close to P<sub>50</sub> = 3.1 torr, balance N<sub>2</sub>) to achieve approximately 50% O<sub>2</sub> saturation and then with 1% CO<sub>2</sub>, 0.44% O<sub>2</sub> (balance N<sub>2</sub>) highlighted by the shaded area. Changes in the % gas in the mixture are indicated by arrows.

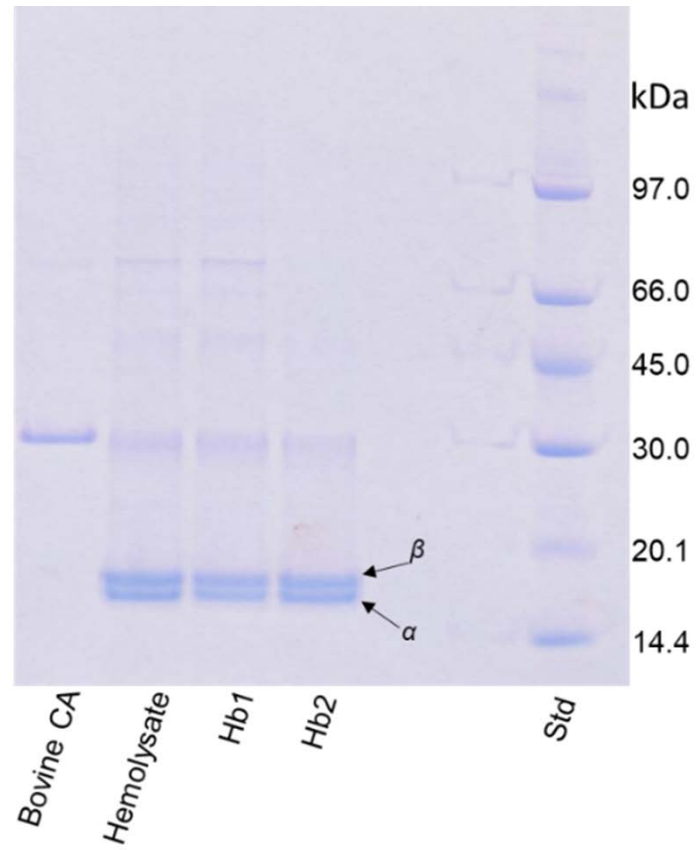

**Fig. S3.** SDS PAGE in the absence of DTT (non-reducing conditions) with bands corresponding to bovine CA II, spectacled caiman hemolysate, purified Hb1 and Hb2, and the protein standard (STD). In the lanes for the hemolysate and purified Hb fractions, bands representing the  $\alpha$  and  $\beta$ -type chains of Hb are indicated.

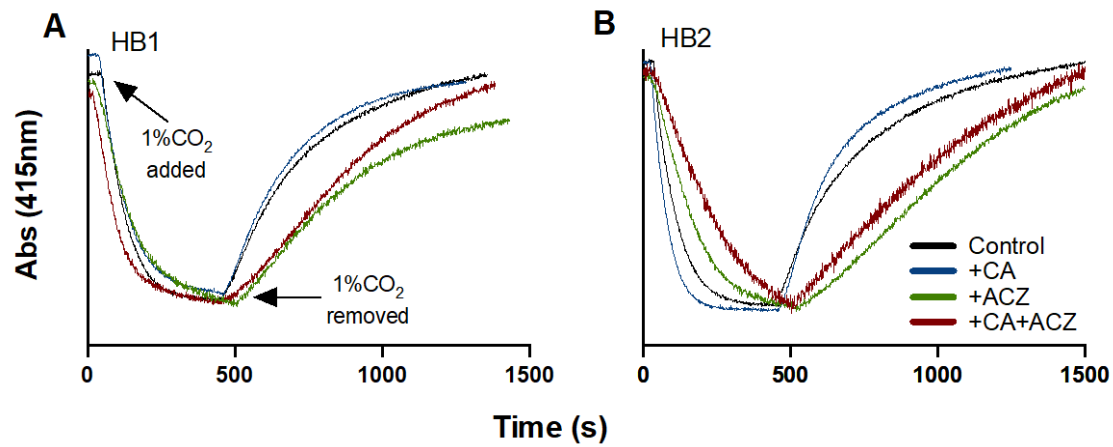

**Fig. S4.** Absorbance traces showing the reversible CO<sub>2</sub>-mediated decrease in Hb-O<sub>2</sub> saturation of purified A) Hb1 and B) Hb2 fractions from spectacled caiman hemolysate, in the presence and absence of acetazolamide (1 mM, ACZ) or bovine carbonic anhydrase II (1 μM, CA), as indicated. Regardless of the presence or absence of carbonic anhydrase, the addition of acetazolamide delays CO<sub>2</sub> dissociation from Hb, after the removal of CO<sub>2</sub> gas. Conditions as in Figure S1.

**Table S1.** Non-linear regression fitting parameters of the CO<sub>2</sub> saturation curves of biological replicates shown in Fig. 3B,C and biological and technical replicates of P<sub>50</sub> measurements of Hb1 and Hb2 (25°C, 0.3 mM heme, 0.1 M HEPES, pH 7.2, 0.5 mM EDTA). CI, confidence interval; Sy.x, standard error of estimate. The double hyperbola fitting produced a very large confidence interval for K'CO<sub>2</sub> (the affinity constant for a second possible binding site), which rules out the possibility for two binding sites for CO<sub>2</sub>.

|                                        | Single hyperbola<br>$Y = \frac{SO_2 \text{ min}}{(X + KCO_2)}$ |             | Double hyperbola<br>$Y = SO_2 \text{ min} \times \left( \frac{1}{(X + KCO_2)} + \frac{1}{(X + K'CO_2)} \right)$ |              |
|----------------------------------------|----------------------------------------------------------------|-------------|-----------------------------------------------------------------------------------------------------------------|--------------|
|                                        | Hb1                                                            | Hb2         | Hb1                                                                                                             | Hb2          |
| SO <sub>2</sub> min                    | 68.77                                                          | 62.16       | 51.23                                                                                                           | 45.16        |
| KCO <sub>2</sub> (torr)                | 1.464                                                          | 1.323       | 1.174                                                                                                           | 1.043        |
| K'CO <sub>2</sub> (torr)               | -                                                              | -           | 13.62                                                                                                           | 10.94        |
| 95% CI for SO <sub>2</sub> min         | 53.38-88.45                                                    | 50.98-75.69 | 33.63-73.04                                                                                                     | 32.77- 60.61 |
| 95% CI for KCO <sub>2</sub>            | 1.099-1.959                                                    | 1.058-1.659 | 0.8728-1.620                                                                                                    | 0.8368-1.340 |
| 95% CI for K'CO <sub>2</sub>           | -                                                              | -           | 2.131-307.7                                                                                                     | 2.719-78.05  |
| Degrees of freedom                     | 16                                                             | 16          | 15                                                                                                              | 15           |
| r <sup>2</sup>                         | 0.9668                                                         | 0.9808      | 0.9757                                                                                                          | 0.9879       |
| Sum.Squares                            | 140.3                                                          | 83.32       | 102.6                                                                                                           | 52.57        |
| Sy.x                                   | 2.961                                                          | 2.282       | 2.615                                                                                                           | 1.872        |
| Values for biological replicates (N=3) |                                                                |             |                                                                                                                 |              |
| P <sub>50</sub> , mean (torr)          | 3.10                                                           | 3.22        |                                                                                                                 |              |
| P <sub>50</sub> , stdev (torr)         | 0.07                                                           | 0.04        |                                                                                                                 |              |
| P <sub>50</sub> , s.e.m. (torr)        | 0.05                                                           | 0.03        |                                                                                                                 |              |
| Values for technical replicates (N=3)  |                                                                |             |                                                                                                                 |              |
| P <sub>50</sub> , mean (torr)          | 3.15                                                           | 3.19        |                                                                                                                 |              |
| P <sub>50</sub> , stdev (torr)         | 0.13                                                           | 0.06        |                                                                                                                 |              |
| P <sub>50</sub> , s.e.m. (torr)        | 0.07                                                           | 0.04        |                                                                                                                 |              |

**Table S2.** Non-linear regression fitting parameters of the bicarbonate saturation curves shown in Fig. 3E,F, and biological and technical replicates of final PO<sub>2</sub> measurements of Hb1 and Hb2 after addition of 2, 4, 7.7, 15.4, 23.1 and 30 mM bicarbonate in the Tucker chamber (0.05 mM heme, 0.1 M HEPES buffer pH 7.2, 0.5 mM EDTA). CI, confidence interval; Sy.x, standard error of estimate.

| Single hyperbola<br>$Y = \frac{\Delta PO_2 max}{(X + K_{bic})}$ | Hb1           | Hb2           |
|-----------------------------------------------------------------|---------------|---------------|
| $\Delta PO_2 max$                                               | 9.934         | 8.994         |
| $K_{bic}$ (mM)                                                  | 3.313         | 2.473         |
| 95% CI for $\Delta PO_2 max$                                    | 8.770-11.38   | 8.346-9.716   |
| 95% CI for $K_{bic}$                                            | 1.887-5.489   | 1.722-3.450   |
| Degrees of Freedom                                              | 16            | 16            |
| $r^2$                                                           | 0.7828        | 0.8728        |
| Sum of Squares                                                  | 15.14         | 5.82          |
| Sy.x                                                            | 0.9728        | 0.6031        |
| Constraints                                                     | $K_{bic} > 0$ | $K_{bic} > 0$ |
| Values for biological replicates (N=3)                          |               |               |
| PO <sub>2</sub> , mean (torr)                                   | 4.42          | 4.26          |
| PO <sub>2</sub> , stdev (torr)                                  | 0.08          | 0.21          |
| PO <sub>2</sub> , s.e.m (torr)                                  | 0.05          | 0.12          |
| Values for technical replicates (N=3)                           |               |               |
| PO <sub>2</sub> , mean (torr)                                   | 4.54          | 4.06          |
| PO <sub>2</sub> , stdev (torr)                                  | 0.02          | 0.03          |
| PO <sub>2</sub> , s.e.m (torr)                                  | 0.01          | 0.02          |
